# Supplementary material for: High three-way catalytic activity of rhodium particles on a Y-stabilized La-containing ZrO2 support: the effect of Y on the enhanced reducibility of rhodium and self-regeneration
Source: Royal Society of Chemistry journal article supplement (doi:10.1039/c4cy01032a), 2014-09-22
Supplement: c4cy01032a1.pdf [file c4cy01032a1.pdf]

Electronic Supplementary Information (ESI) for

Revised at 2014/08/8

## Highly active three-way catalysis of rhodium particles on a Y-stabilized La-containing ZrO<sub>2</sub> support: Effect of Y on the enhanced reducibility of rhodium and self-regeneration

(Manuscript ID CY-ART-06-2014-000800)

Hisaya Kawabata,<sup>\*ab</sup> Yuki Koda,<sup>a</sup> Hirosuke Sumida,<sup>a</sup> Masahiko Shigetsu,<sup>a</sup> Akihito Takami<sup>a</sup> and Kei Inumaru<sup>b</sup>

<sup>a</sup>Advanced Materials Research Field, Technical Research Center, Mazda Motor Corporation, 3-1 Shinchi, Fuchu-cho, Aki-gun, Hiroshima 730-8670, Japan. E-mail: kawabata.h@mazda.co.jp; Fax: +81-82-252-5342; Tel: +81-82-252-5068

<sup>b</sup>Department of Applied Chemistry, Graduate School of Engineering, Hiroshima University, 1-4-1 Kagamiyama, Higashi-Hiroshima 739-8527, Japan. E-mail: inumaru@hiroshima-u.ac.jp; Fax: +81-82-424-5494; Tel: +81-82-424-7741

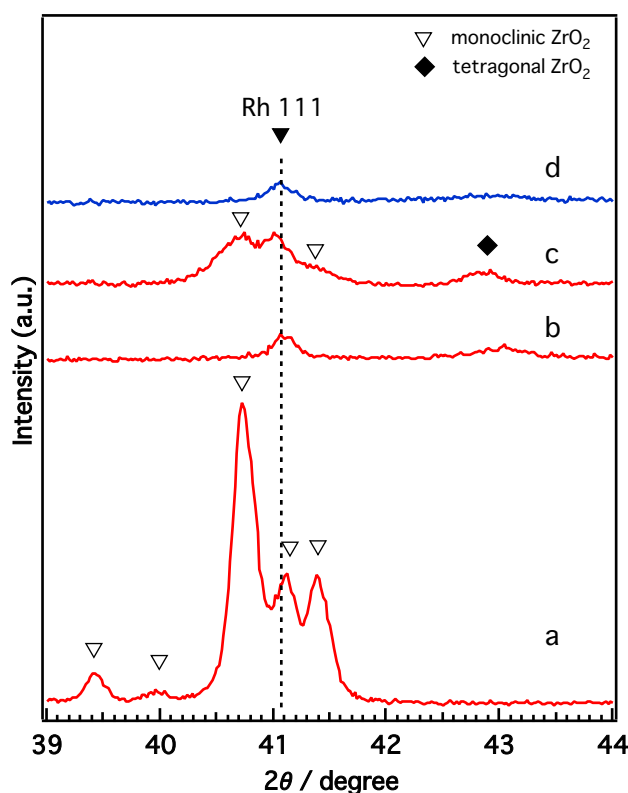

Fig. S1. XRD patterns for the aged catalysts of Rh111 region at (a) Rh/ZrO<sub>2</sub>, (b) Rh/Zr–Y–O, (c) Rh/Zr–La–O and (d) Rh/Zr–Y–La–O. Aging was conducted at 1273 K in a 2 % O<sub>2</sub>, 10 % H<sub>2</sub>O, N<sub>2</sub> atmosphere for 24 h.

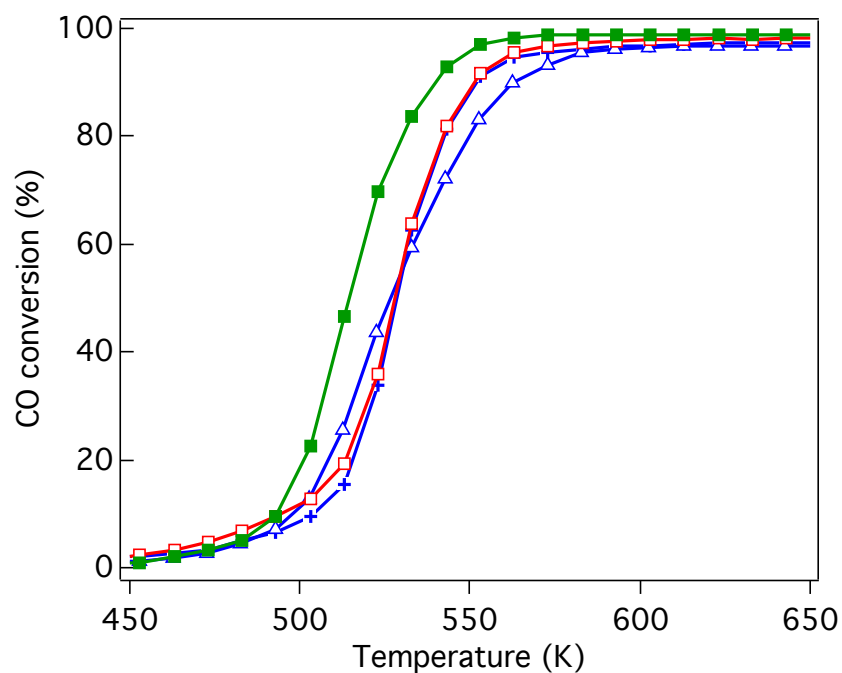

Fig. S2. CO conversion of the fresh three-way catalysts that underwent the reaction gas pre-treatment. The catalysts studied were (+) Rh/ZrO<sub>2</sub>, (△) Rh/Zr-Y-O, (□) Rh/Zr-La-O, and (■) Rh/Zr-Y-La-O.

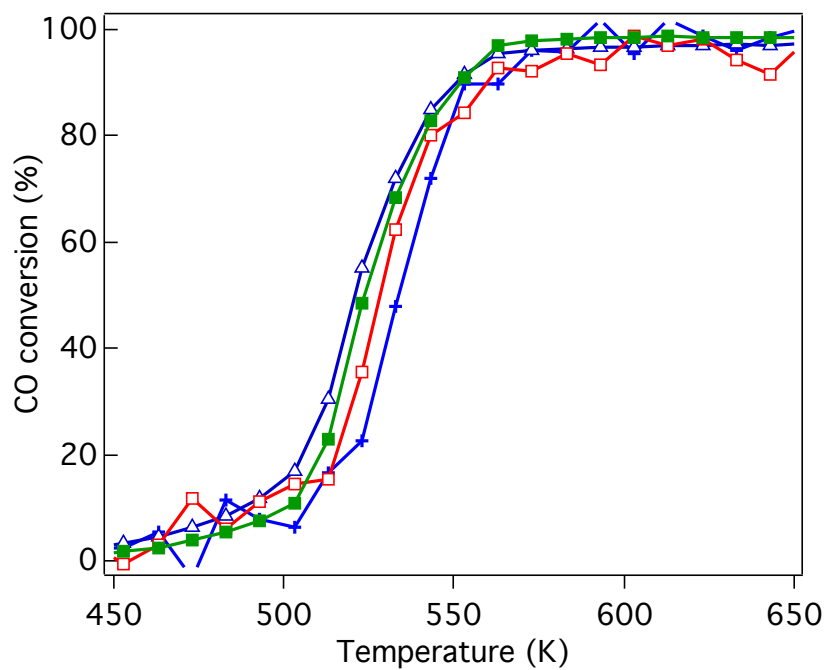

Fig. S3. CO conversion by the fresh three-way catalysts that underwent the oxidation treatment. The catalysts studied were (+) Rh/ZrO<sub>2</sub>, (△) Rh/Zr-Y-O, (□) Rh/Zr-La-O, and (■) Rh/Zr-Y-La-O.

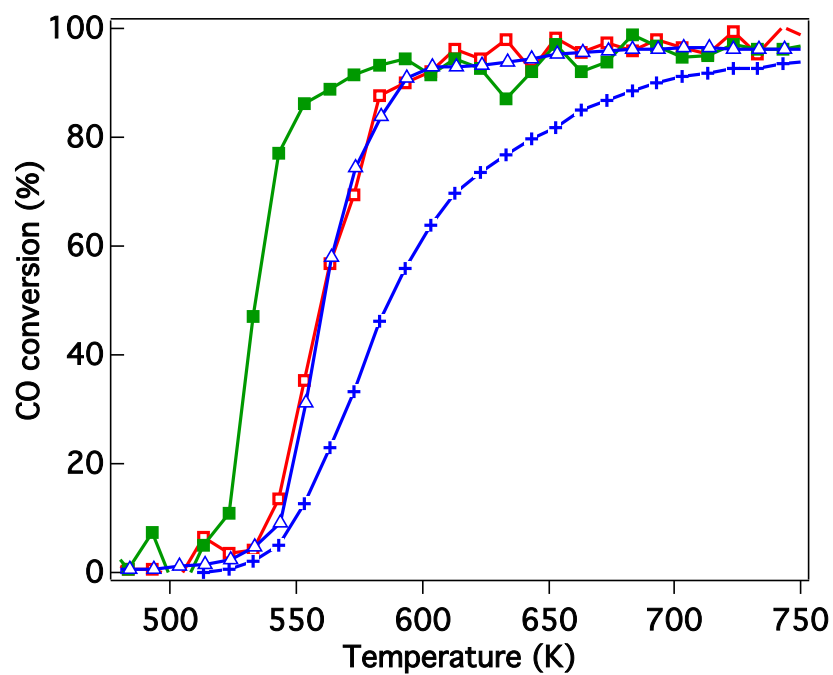

Fig. S4. CO conversion by the aged three-way catalysts that underwent the reaction gas pre-treatment. The catalysts studied were (+) Rh/ZrO<sub>2</sub>, ( $\Delta$ ) Rh/Zr-Y-O, ( $\square$ ) Rh/Zr-La-O, and ( $\blacksquare$ ) Rh/Zr-Y-La-O.

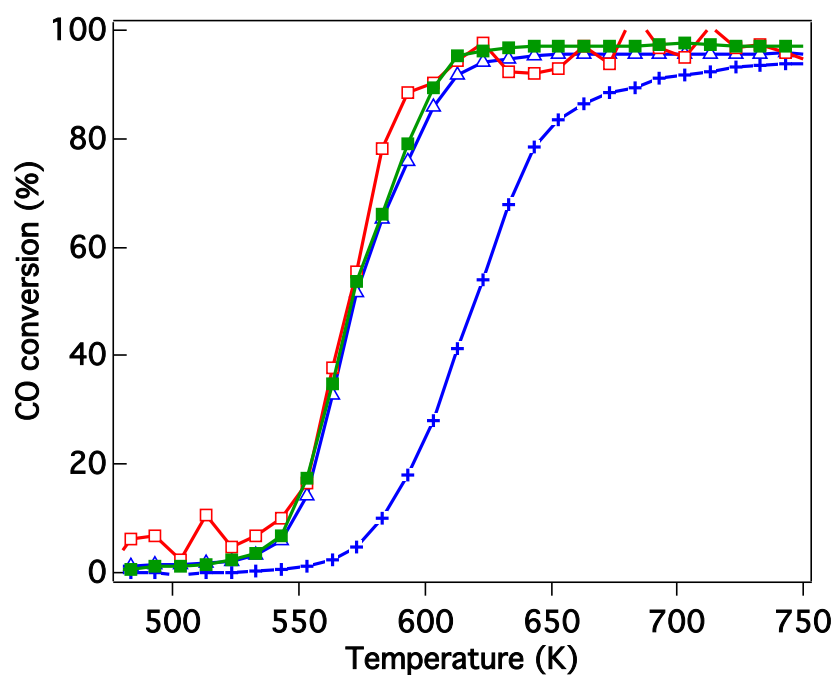

Fig. S5. CO conversion by the aged three-way catalysts that underwent the oxidation treatment. The catalysts studied were (+) Rh/ZrO<sub>2</sub>, ( $\Delta$ ) Rh/Zr-Y-O, ( $\square$ ) Rh/Zr-La-O, and ( $\blacksquare$ ) Rh/Zr-Y-La-O.

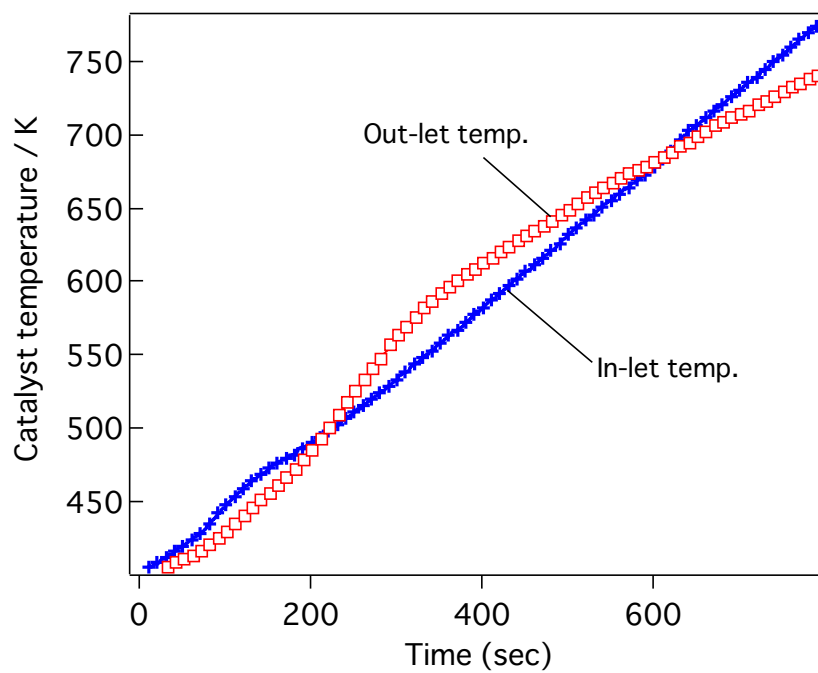

Fig. S6. Catalyst in-let and out-let temperature during the three-way catalytic activity measurement of aged Rh/Zr–Y–La–O. Aging was conducted at 1273 K and in 2 % O<sub>2</sub> and 10 % H<sub>2</sub>O/N<sub>2</sub> for 24 h.

### EDX mapping of aged Rh/Zr-Y-O

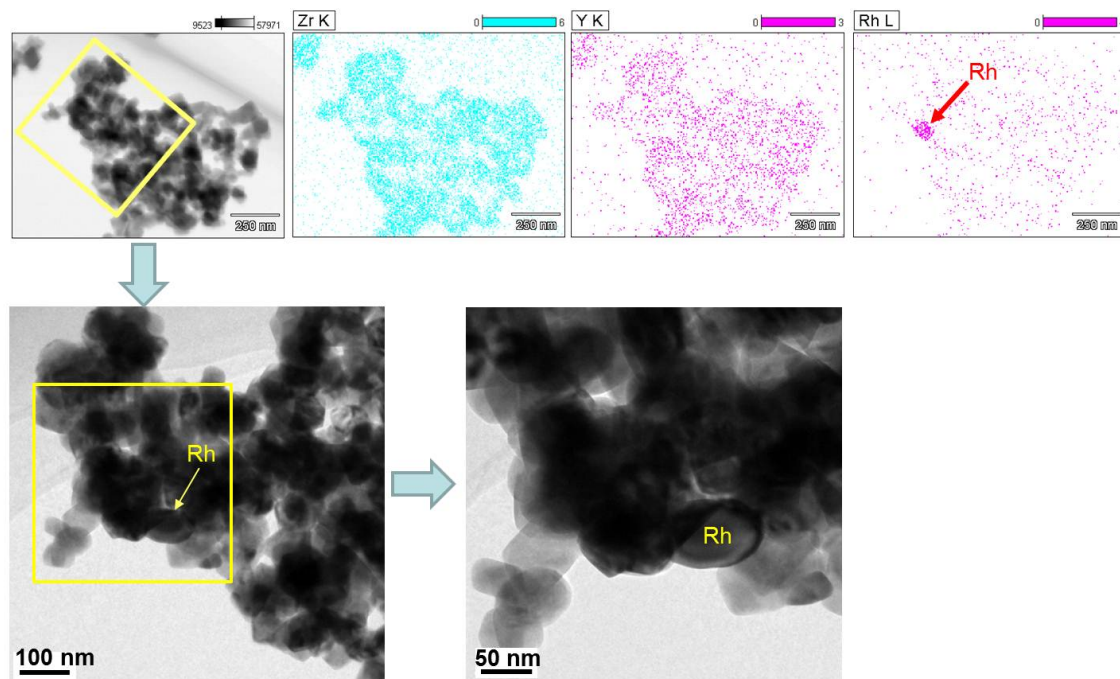

Fig. S7. EDX mapping of aged Rh/Zr-Y-O. Aging was conducted at 1273 K and in 2 % O<sub>2</sub> and 10 % H<sub>2</sub>O/N<sub>2</sub> for 24 h.

### EDX mapping of aged Rh/Zr-La-O

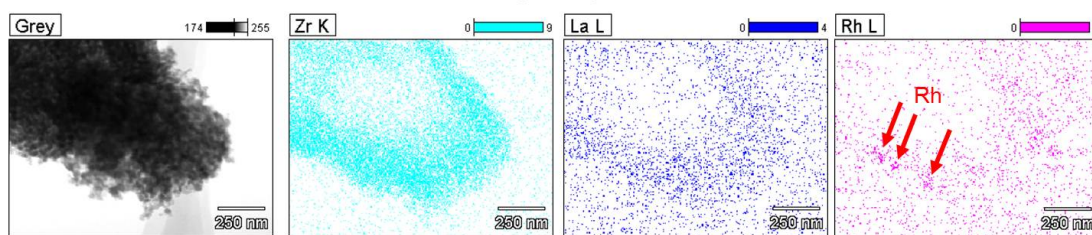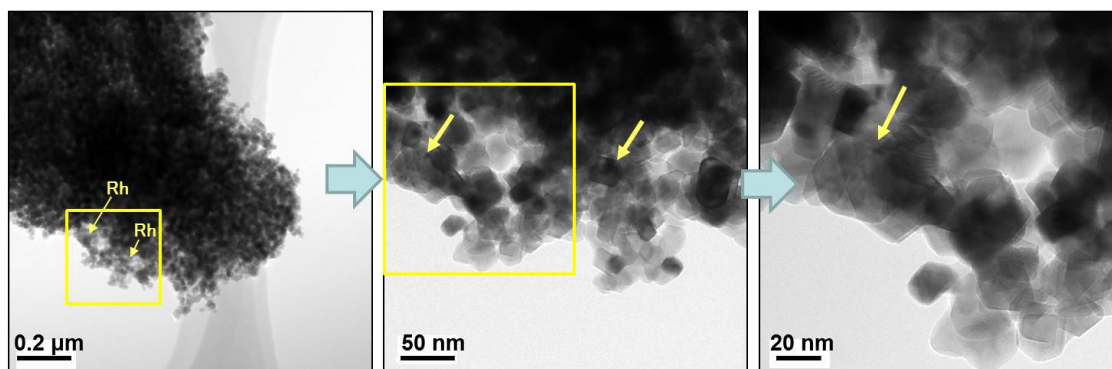

### EDX spectra of aged Rh/Zr-La-O

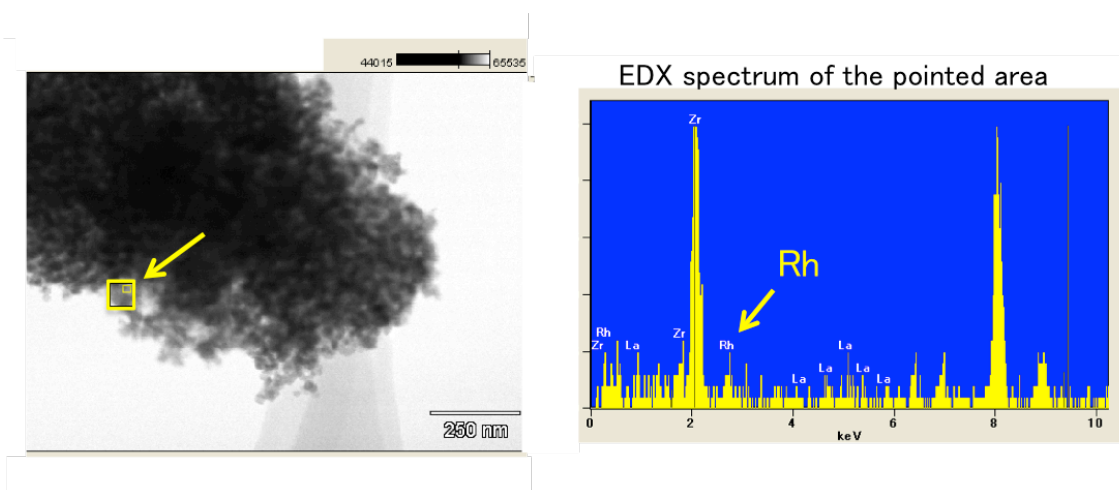

Fig. S8. EDX mapping and EDX spectrum of aged Rh/Zr-La-O. Aging was conducted at 1273 K and in 2 % O<sub>2</sub> and 10 % H<sub>2</sub>O/N<sub>2</sub> for 24 h.

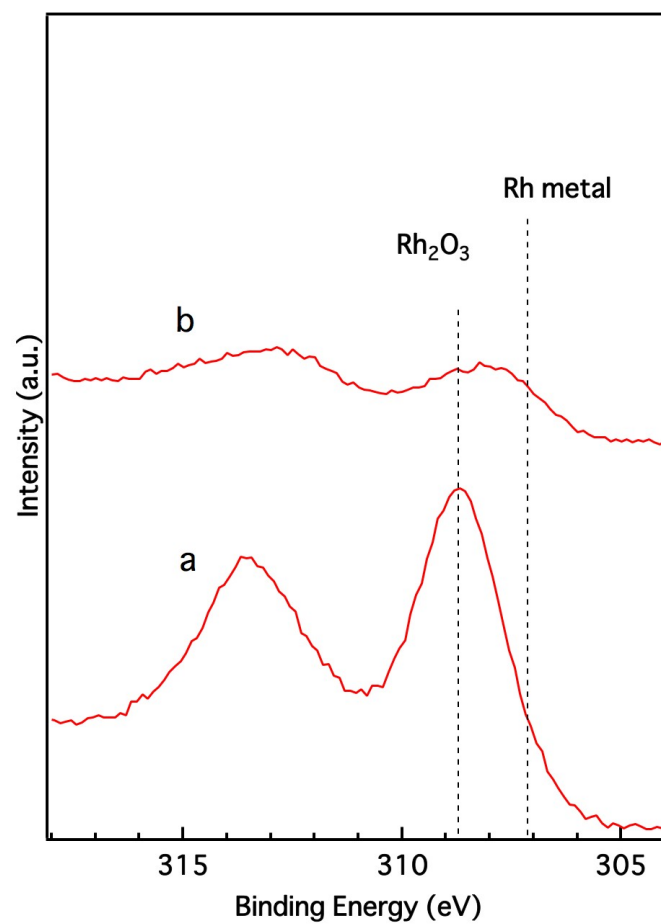

Fig. S9. (Re-numbered: At first submit, as Fig. S1) Rh 3d spectra of the fresh catalysts after the three-way catalytic reaction at 773 K for 10 min and 5 % O<sub>2</sub> exposure at 773 K for 5 min. (a) Rh/ZrO<sub>2</sub>, (b) Rh/Zr-La-O.

End of the ESI
